# Supplementary material for: The Impacts of Burn Severity and Frequency on Erosion in Western Arnhem Land, Australia
Source: MDPI journal article supplement (doi:10.3390/s24072282), 2024-04-03
Supplement: s1 [file s1]

## Supplementary Information

### Digital Earth Australia – Data Loading Query

The query used to load Landsat data from Digital Earth Australia is presented below to allow better reproducibility of the results in this article:

```
query = {  
  'geopolygon': geom,  
  'time': ('2005-01-01', '2018-21-31'),  
  'measurements': ['nbart_nir', 'nbart_swir_2'],  
  'output_crs': 'EPSG:3577',  
  'resolution': (30, 30),  
  'group_by': 'solar_day'
```

NOTE: the variable 'geom' is the catchment shapefile projected in EPSG:3577 which is GDA94 Australian Albers.

For the present study, this query was used to load analysis ready data products:

- ga\_ls5t\_ard\_3
- ga\_ls7e\_ard\_3
- ga\_ls8c\_ard\_3

With corrections applied to the Landsat 8 product as per the text in Section 2.4 in the main body of the article.

### Supplementary Terrain Analysis Results

Table S1 shows the coefficient of determination ( $R^2$ ) of the relationship between SWI and TWI against the erosion measurements for each year.

Table S1.  $R^2$  calculated between the SWI and TWI against the erosion/deposition from every year.

| Year | SWI    | TWI    |
|------|--------|--------|
| 2006 | 0.0008 | 0.0243 |
| 2007 | 0.0001 | 0.0067 |
| 2008 | 0.0458 | 0.0128 |
| 2009 | 0.0063 | 0.0403 |
| 2010 | n/a    | n/a    |
| 2011 | 0.0028 | 0.0001 |
| 2012 | 0.0074 | 0.0008 |
| 2013 | 0.0124 | 0.0113 |
| 2014 | n/a    | n/a    |
| 2015 | 0.0008 | 0.0008 |
| 2016 | 0.0595 | 0.0004 |
| 2017 | 0.0385 | 0.0205 |
| 2018 | 0.0179 | 0.0015 |
